1 **Short title:** Distinct roles of hydroxypyruvate reductases in photorespiration

2

3 **Title:** Integrative analysis of the hydroxypyruvate reductases revealing their distinct roles in  
4 photorespiration of *Chlamydomonas*

5

6 Menglin Shi<sup>1</sup>, Lei Zhao<sup>2,3,\*</sup>, #, Yong Wang<sup>1,\*</sup>, #

7

8 1. College of Life Sciences, Nankai University, Tianjin 300071, China

9 2. Key Laboratory of Systems Microbial Biotechnology, Tianjin Institute of Industrial  
10 Biotechnology, Chinese Academy of Sciences, Tianjin 300308, China

11 3. National Technology Innovation Center of Synthetic Biology, Tianjin 300308, China

12

13 \* Senior Authors: Yong Wang, wangyong@nankai.edu.cn; Lei Zhao, zhaol@tib.cas.cn

14

15 # To whom correspondence should be addressed:

16 Yong Wang, Ph.D.

17 College of Life Sciences, Nankai University

18 Weijin Road 94, Tianjin 300071, China

19 Tel: +86-022-23504388

20 e-mail: wangyong@nankai.edu.cn

21

22 Lei Zhao, Ph.D.

23 Tianjin Institute of Industrial Biotechnology, Chinese Academy of Sciences

24 32 West 7th Avenue, Tianjin Airport Economic Area, Tianjin 300308, China

25 Tel: +86-022-24828786

26 e-mail: zhaol@tib.cas.cn

27

28 **Brief summary**

29 Identification and characterization of genes encoding hydroxypyruvate reductases in

30 *Chlamydomonas*, demonstrating difference in the enzymatic activity, subcellular location, as well

31 as function in photorespiration.

32

33 **Abstract**

34 Photorespiration plays an important role in maintaining normal physiological metabolism in  
35 higher plants and other oxygenic organisms such as algae. The unicellular eukaryotic organism  
36 *Chlamydomonas* is reported to have a different photorespiration system from that in higher plants,  
37 and only two out of nine genes encoding photorespiratory enzymes have been experimentally  
38 characterized. Hydroxypyruvate reductase (HPR), which is responsible for the conversion of  
39 hydroxypyruvate into glycerate, is poorly understood and not yet explored in *Chlamydomonas*. To  
40 identify the candidate genes encoding hydroxypyruvate reductase in *Chlamydomonas* (CrHPR)  
41 and uncover their elusive functions, we performed sequence comparison, enzyme activity  
42 measurement, subcellular localization, and analysis of knockout/knockdown strains. Together we  
43 identify five proteins to be good candidates as CrHPRs, all of which are detected with the activity  
44 of hydroxypyruvate reductase. CrHPR1, a NADH-dependent enzyme in mitochondria, may  
45 function as the major component of photorespiration, and deletion of *CrHPR1* causes severe  
46 photorespiratory defects. CrHPR2 takes parts in the cytosolic bypass of photorespiration as the  
47 compensatory pathway of CrHPR1 for the reduction of hydroxypyruvate. CrHPR4, with NADH as  
48 the cofactor, may participate in photorespiration by acting as the chloroplastidial glyoxylate  
49 reductase in glycolate-quinone oxidoreductase system. Therefore, our results reveal that the  
50 CrHPRs are far more complex than previously recognized, and provide a greatly expanded  
51 knowledge base for studies to understand how CrHPRs perform their functions in photorespiration.  
52 These will facilitate the genetic engineering for crop improvement by synthetic biology.

53

54

55

56 **Key Words:** photorespiration, photosynthesis, hydroxypyruvate reductase, glycolate,

57 *Chlamydomonas*,

58

## 59 INTRODUCTION

60 Photosynthesis and photorespiration are the two major pathways of plant primary metabolism  
61 mediated by the bifunctional enzyme ribulose biphosphate carboxylase/oxygenase (Rubisco,  
62 Griffiths, 2006). Since the cellular O<sub>2</sub> concentration is much higher than that of CO<sub>2</sub>,  
63 correspondingly high amount of photosynthetically fixed carbon is released via the oxidation of  
64 Rubisco during photorespiration (Somerville, 2001). The loss of fixed carbon associated with  
65 photorespiration could be greatly elevated by the rising temperature and drought, resulting in the  
66 severe reduction of crop yields (Bauwe et al., 2012). Hence, photorespiration is becoming the  
67 important target for crop improvement and obtaining more attention considering that the world  
68 will face more serious challenges such as extreme climate and severe food shortage (Ort et al.,  
69 2015).

70 Photorespiration, conserved in higher plants and most algae, comprises a series of nine  
71 consecutive enzymatic reactions distributed over chloroplasts, peroxisomes, mitochondria, and the  
72 cytosol (Bauwe et al., 2012). It starts from the catalysis mediated by Rubisco in chloroplast, in  
73 which ribulose 1,5-bisphosphate (RuBP) is oxidized into 2-phosphoglycolate (2-PG) and  
74 3-phosphoglycerate (3-PGA, Tcherkez, 2013). 2-PG is dephosphorylated by the phosphoglycolate  
75 phosphatase, leading to the generation of glycolate which enters photorespiratory metabolism flux  
76 for the further conversion (Douce and Heldt, 2000). In the penultimate step of photorespiration  
77 cycle, hydroxypyruvate is converted to glycerate catalyzed by hydroxypyruvate reductase (HPR),  
78 and eventually to Calvin-Benson intermediate 3-PGA (Hagemann and Bauwe, 2016). Despite the  
79 good consensus on the photorespiratory cycle, the serial catalytic enzymes and the detailed  
80 functions till now have not yet been globally characterized (Eisenhut et al., 2019). One question  
81 that remains to be resolved is concerning the presence and function of hydroxypyruvate reductase  
82 in *Chlamydomonas* photorespiration, which is the topics of the present study.

83 HPRs are highly conserved evolutionarily, however, they are only experimentally  
84 characterized in limited extent, especially in terms of underlying gene at molecular level. Since  
85 1970s, HPRs have been purified and studied on their enzymological property with then  
86 state-of-the-art methodology, and the studies mainly focused on HPRs from barley (Kleczkowski  
87 et al., 1990), Spinach (Kleczkowski et al., 1988, 1991), Cucumber (Titus et al., 1983; Greenler et  
88 al., 1989; Schwartz et al., 1992), Pumpkin (Hayashi et al., 1996; Mano et al., 2000), *Arabidopsis*  
89 (Mano et al., 1997; Cousins et al., 2008) and *Chlamydomonas* (Stabenau et al., 1974; Husic and  
90 Tolbert, 1987). Until recently, functional details of the underlying genes are revealed in model  
91 organism like *Arabidopsis*. The deletion of *HPRI* causes no visible alternation of growth or  
92 photorespiration in atmospheric air, differentiating from the lethal phenotype displayed by the

93 mutants with impairment in other photorespiratory components (Murray et al., 1989; Timm et al.,  
94 2008; Cousins et al., 2011; Ye et al., 2014). The non-typical photorespiratory phenotypes of *hpr1*  
95 could be explained by the study from *Arabidopsis*, in which the missing of peroxisome-targeting  
96 AtHPR1 is partially compensated by the cytosolic bypass of photorespiration mediated by  
97 AtHPR2 (Timm et al., 2008; Li et al., 2019). Nevertheless, the combined deletion of both *HPR1*  
98 and *HPR2* does not result in the lethal phenotype of *hpr1hpr2*, though the typical photorespiratory  
99 characteristics were detected (Timm et al., 2008; Ye et al., 2014), suggesting the presence of  
100 additional HP-reducing enzyme. With BLAST search, HPR3 was identified to be the potential  
101 candidate for such enzyme in *Arabidopsis*, and it showed activity with HP using NADPH as the  
102 co-substrate (Timm et al., 2011). Interestingly, HPR3 could accept glyoxylate as a substrate, thus  
103 it may represent an additional bypass both to known HPRs and to glyoxylate reductases in  
104 chloroplasts (Timm et al., 2011).

105 Unlike the higher plants, *Chlamydomonas* employed a CO<sub>2</sub> concentration mechanism (CCM)  
106 to increase CO<sub>2</sub> concentration in the vicinity of Rubisco, and its photorespiration system is  
107 assumed to work differently (Wang et al., 2015). Shortly after transfer from high CO<sub>2</sub> to low CO<sub>2</sub>,  
108 but before the induction of CCM, photorespiration metabolism was induced rapidly and briefly  
109 (Brueggeman et al., 2012). Moreover, photorespiration is assumed to pass through the  
110 mitochondria rather than peroxisome in *Chlamydomonas*, which is not yet to be globally studied  
111 and confirmed (Nakamura et al., 2005). In terms of HPR, Stabenau initially detected the CrHPR  
112 activity in mitochondria (Stabenau, 1974), then Husic and Tolbert further investigated the  
113 enzymatic characteristics with the cell extracts (1985). In the decades since then, no further  
114 research on CrHPRs is reported, and both the underlying genes and their detailed functions remain  
115 waiting to be discovered.

116 To search for the elusive CrHPRs, we have now exploited the *Chlamydomonas* genome and  
117 identified 5 proteins as candidates for being novel CrHPRs. Detailed studies indicate that all five  
118 CrHPRs are detected with the activity of HPR. Using both bioinformatics and cell biology  
119 approaches, we were able to define the subcellular location of CrHPRs. We further addressed the  
120 physiological roles of *CrHPR1*, *CrHPR2* and *CrHPR4* by analyzing the respective  
121 knockout/knockdown strains, and revealed their distinct roles in photorespiration. These findings  
122 are important steps toward understanding how CrHPRs perform their functions, and will facilitate  
123 the genetic engineering for crop improvement by providing prime targets for modification.

124

## 125 **RESULTS**

### 126 **Identification and bioinformatic analysis of CrHPRs**

127 HPR proteins are highly conserved over a wide range of species (Kutner et al., 2018). The putative  
128 Chlamydomonas HPR homolog is the protein encoded by *Cre06.g295450.t1.2* (hereafter  
129 designated as *CrHPR1*). Sequence alignment of HPR proteins from select species indicated the  
130 conservation of CrHPR1 as hydroxypyruvate reductase, manifesting as the presence of highly  
131 conserved NAD(P)-binding motif, NAD recognition sites, substrate-orienting and catalytic pair  
132 domains (Fig. S1).

133 To identify all candidate CrHPRs, protein sequence of CrHPR1 was used to search against the  
134 Chlamydomonas Proteome via the BLASTP function built on the widely used online service,  
135 including Phytozome 12, HMMER or AlgaePath, with the default parameters. The same list of  
136 eight proteins was retrieved with each of the three independent searches, and CrHPR1 itself was  
137 identified with the lowest E-value. Three remarkably similar proteins encoded by *Cre07.g344400*,  
138 *Cre07.g344550* and *Cre07.g344600*, respectively and annotated as phosphoglycerate  
139 dehydrogenase, were identified possibly because of the presence of NAD-binding and catalytic  
140 domains. Since they were reported to function in thylakoid membrane remodeling in response to  
141 adverse environmental conditions (Du et al., 2018), they are unlikely candidates for CrHPRs  
142 related to photorespiration, and were not characterized further.

143 To confirm whether the proteins encoded by *Cre01.g019100.t1.2*, *Cre02.g087300.t1.3*,  
144 *Cre07.g324550.t1.3* and *Cre16.g689700.t1.3*, were authentic CrHPRs, sequence alignment was  
145 performed with CrHPR1 as the reference. As shown in Fig. S2, these five proteins shared the  
146 conserved HPR domains suggesting that they are good candidates as hydroxypyruvate reductase.  
147 Therefore, *Cre01.g019100.t1.2*, *Cre02.g087300.t1.3*, *Cre07.g324550.t1.3* and *Cre16.g689700.t1.3*  
148 were serially named as *CrHPR2*, *CrHPR3*, *CrHPR4* and *CrHPR5* according to their location in  
149 chromosome, respectively, which together with *CrHPR1* made of five candidate genes encoding  
150 hydroxypyruvate reductase in Chlamydomonas genome.

151

### 152 **CrHPRs are proteins with hydroxypyruvate reductase activity**

153 To determine how reliable our identification of potentially novel CrHPRs was and compare their  
154 enzymatic properties, CrHPRs identified above were heterologous expressed in *E. coli* and tested  
155 different substrate and cofactor combinations (Table 1). The expression and purification of  
156 tagged-recombinant CrHPRs were assayed with SDS-PAGE gels. As shown in Fig. S3, the  
157 recombinant CrHPR proteins were obtained at high purity, and each migrated at the  
158 expected molecular weight on the gels.

159 With the purified recombinant CrHPRs, we measured the enzymatic activity with different  
160 substrate and cofactor combinations (Table 1). Tag-purified recombinant CrHRP1 was active in  
161 the presence of NADH and hydroxypyruvate, whereas NADPH-dependent rate was >180 times  
162 lower (312.5 vs 1.70  $\mu\text{mol}\cdot\text{min}^{-1}\cdot\text{mg}^{-1}$  protein). The enzyme also accepted glyoxylate as a  
163 substrate, but at a considerably lower efficiency in the presence of NADH (312.5 vs 13.91  
164  $\mu\text{mol}\cdot\text{min}^{-1}\cdot\text{mg}^{-1}$  protein). These parameters established CrHRP1 as the NADH-dependent HPR  
165 in *Chlamydomonas*. By contrast, CrHPR5 mainly presented as the NADPH-dependent HPR with a  
166 much higher enzymatic activity than that of any other combinations (>50 times).

167 CrHPR3 and CrHPR4 were detected with cofactors specificity, and they were only active in  
168 the presence of NADPH and NADH, respectively. Intriguingly, CrHPR4 could accept pyruvate as  
169 substrate with correspondingly high enzymatic activity, suggesting its potential roles in  
170 fermentative metabolism (Burgess et al., 2015). Although it also accepted both hydroxypyruvate  
171 and glyoxylate as substrates, the catalytic efficiency is much lower than that with pyruvate (<15  
172 times). The purified CrHPR2 showed relaxed activity with both NADH and NADPH, and  
173 hydroxypyruvate was the more favored substrate than glyoxylate.

174

#### 175 **CrHPRs may function in multiple subcellular regions**

176 To explore the potential functions of CrHPRs, phylogenetic tree was generated to infer their  
177 evolution characteristics using the maximum likelihood algorithm (Kumar et al., 2015). As shown  
178 in Fig. S4, CrHRP1 was assigned into the plant subgroup, suggesting its conservation in  
179 plant-specific metabolism during evolution, and it's consistent with the alignment analysis (Fig.  
180 S1). CrHPR4 presented closely association with the photosynthetic cyanobacteria subgroup, which  
181 may imply its potential role in chloroplast considering the endosymbiotic hypothesis (Martin et al.,  
182 2015). CrHPR2, CrHPR3 and CrHPR5 are likely originated from the bacteria as they were put  
183 into the ascomycetes and firmicutes subgroups, suggesting that they may participate in  
184 mitochondrial or cytosolic metabolism.

185 To determine the reliability of subcellular localization inferred from phylogenetic analysis,  
186 either the N-terminal or C-terminal of CrHPRs was tagged with mCerulean fluorescent protein  
187 (CFP) as described in methods. Then the constructs were transformed into WT/CC-125 strain,  
188 screened for the positive clones, and assayed by laser confocal microscopy. As visible in Fig.S5,  
189 CrHRP1- and CrHPR5-CFP (amino acids of the N-terminus of CrHPR2 and CrHPR5)  
190 accumulated in the punctuated dots distributed in cytosol, and they likely function in mitochondria  
191 as no putative peroxisomal localization sequence, PTS1 or PTS2, were identified in their  
192 sequences (Gould et al., 1987; Swinkels et al., 1991). Using both N-terminal and C-terminal  
193 tagging only, CrHPR2 and CrHPR3 were confirmed to diffusely presented in the cytosol.

194 Chloroplast targeting was found for CrHPR4 (amino acids of the C-terminus) supported by the  
195 overlapping between CFP-CrHPR4 signal and chlorophyll autofluorescence, and it's in  
196 accordance with previous study (Burgess et al., 2015). Therefore, inference of CrHPRs'  
197 subcellular localization from phylogenetic analysis is in consistent with the results of fluorescence  
198 microscopy.

199

### 200 **NADH-dependent CrHPRs take parts in photorespiration as the major components**

201 Previous studies revealed that, cofactors, such as NADH or NADPH, are combined with the  
202 substrate in the catalytic reaction of HPRs (Lassalle et al., 2016). Based on this, we designed a  
203 strategy of two steps to determine the CrHPRs participating in photorespiration.

204 Step 1: We examined the cofactors (NADH or NADPH) employed in photorespiration, from  
205 which we could infer the related CrHPRs on the basis of their catalytic characteristics (Table 1).  
206 As shown in Fig. 1A, the enzyme activity of NADH-dependent HPRs was much higher in  
207 photorespiration induced by air condition than that under non-photorespiration condition (CO<sub>2</sub>  
208 condition) while the activity of NADPH-dependent HPRs was only slightly changed, which  
209 demonstrated the major roles of NADH-dependent CrHPRs in photorespiration. Since CrHPR1,  
210 CrHPR2, CrHPR4 and CrHPR5 were detected with the activity of HPRs in the presence of NADH  
211 (Table 1), thus their participation in photorespiration were examined further.

212 Step 2: If CrHPRs function in photorespiration, they could be induced in such condition.  
213 Based on the assumption, we monitored their transcriptional profiles to determine the CrHPRs  
214 involved in photorespiration. As indicated in Fig. 1B, a 2-fold increasement of *CrHPR1* and  
215 *CrHPR4* was detected in their transcriptional levels when cells were transferred from CO<sub>2</sub> to air  
216 conditions, suggesting their potential roles in photorespiration. By contrast, we did not observe  
217 significant difference of *CrHPR2* or *CrHPR5* transcripts between CO<sub>2</sub> and air conditions,  
218 suggesting their fewer dominant roles in photorespiration than *CrHPR1* or *CrHPR4* (Fig. 1B).

219 Together, the NADH-dependent CrHPRs take parts in photorespiration as the major  
220 components, in which CrHPR1 and CrHPR4 may play more important roles than CrHPR2 and  
221 CrHPR5.

222

### 223 **Knockout of CrHPR1 impairs photorespiration**

224 CrHPR1 was confirmed with high NADH-dependent activity, and may play major roles in  
225 photorespiration (Table 1, Fig. 1). To explore its physiological function, we set out to isolate the  
226 insertion strain for *CrHPR1/Cre06.g295450.t1.2* within the mutant library generated previously  
227 (Cheng et al., 2017). As shown in Fig. 2A, the paromomycin resistance cassette *AphVIII* was

228 inserted into the seventh intron in *Crhpr1*, which was confirmed by the genome sequencing (data  
229 not shown). The knockout then was verified by qRT-PCR analysis using primers that span the  
230 cassette insertion site as described in methods. The mature transcript was found to be greatly  
231 disrupted in the mutant as indicated in Fig. 2B and C. These results confirmed the knockout of the  
232 *CrHPR1/Cre06.g295450.t1.2* in the insertion line *Crhpr1*, and used for the further study.

233 As visible in Fig. 2E, *Crhpr1* presented no noticeable difference of growth to WT when they  
234 were cultured in tris-minimal medium under high CO<sub>2</sub> conditions. However, the photorespiratory  
235 defects of *Crhpr1*, such as retarded growth and decreased ratio of Rubisco  
236 (oxidation/carboxylation), were observed when the cells were transferred to the air condition (Fig.  
237 2D and F, Table S5). Interestingly, a stronger ability to process photosynthetic electron flow was  
238 detected in *Crhpr1*, manifesting as the elevation in the maximum photochemical quantum yield of  
239 PSII, maximum electron transfer efficiency, and reduction in the minimum saturating irradiance  
240 (Fig. S6). The phenotypic defects of *Crhpr1* may result from the leakage of photosynthetically  
241 fixed carbon, which is supported by the more glycolate excreted into the medium by *Crhpr1* as  
242 measured in Fig. 2G. Overexpression of *CrHPR1* in WT/CC-125 did not bring in visually  
243 phenotypic changes (Fig. 2D, E, F and G).

244 The phenotypes of *Crhpr1* detected above were restored to the WT/CC-125 level in the  
245 rescued strain *Crhpr1:CrHPR1* (Fig. 2B, C, D, F and G; Fig. S6), which provided evidence that  
246 the photorespiration is disrupted in *Crhpr1* and thus that the function of CrHPR1 is closely related  
247 to photorespiration.

248

#### 249 **CrHPR2 knockdown strains show photorespiratory defects at *Crhpr1* background**

250 Although CrHPR2 was detected with NADPH-dependent HPR activity, it was not induced in  
251 WT/CC-125 under photorespiratory condition as indicated by qRT-PCR analysis (Fig. 1A), and no  
252 difference in phenotypes of CrHPR2 knockdown strains and WT/CC-125 was observed (Table S6,  
253 Fig. S7). We speculated that CrHPR2 performs the compensatory functions of CrHPR1, and it  
254 may act as the major component in the extra-mitochondria hydroxypyruvate-reducing pathway in  
255 *Chlamydomonas*, which could catalyze the redundant hydroxypyruvate penetrated from  
256 mitochondria. To test this possibility, we compared the transcript level of *CrHPR2* in WT/CC-125  
257 and *Crhpr1*. As shown in Fig. 3A, the expression of *CrHPR2* was greatly induced in air when  
258 *CrHPR1* was deleted, which verified the potential role of *CrHPR2* in photorespiration mentioned  
259 above. To explore its physiological function, we generated the *CrHPR2* knockdown strains at  
260 *Crhpr1* background, yielding serial *Crhpr1-a2* mutants. qRT-PCR analysis indicated that *CrHPR2*  
261 transcript in *Crhpr1-a2* strains was reduced to various extents of that in WT/CC-125 (Fig. 3B),  
262 which confirmed the disruption of *CrHPR2* expression. Thus, they were used for further analysis.



263 Although the expression of *CrHPR2* was greatly destroyed, no visible difference in growth  
264 was observed between *Crhpr1* and *Crhpr1-a2* strains when the cells were cultured in air,  
265 regardless of the solid or liquid medium (Fig. 3C and D). Nevertheless, the catalytic rate of  
266 Rubisco (carboxylation/oxidation) of *Crhpr1-a2* strains was much lower than that of *Crhpr1*,  
267 especially that the carboxylation rate was greatly affected in *Crhpr1-a2* (Fig. 3E, Table S7). These  
268 results suggest that the photosynthetic activity of *Crhpr1-a2* may have been affected by the  
269 increased glycolate excreted by the strains. We further measured the concentration of glycolate  
270 secreted to the medium by respective mutants, and the results indicated that more glycolate was  
271 indeed released by *Crhpr1-a2* strains than *Crhpr1* (Fig. 3F).

272 These evidences confirm that photorespiration is affected in the *CrHPR2* knockdown strains,  
273 and *CrHPR2* is indeed associated with photorespiration. This exacerbated excretion of glycolate  
274 by *Crhpr1-a2* may bring damage to photosynthesis in some extents, manifesting as the decreased  
275 quantum yield efficiency of PSII, electron transfer rate and minimum suturing irradiance (Fig. S8).

276  
277

#### 278 **CrHPR4 participates in photorespiration as a chloroplast-targeting glyoxylate reductase**

279 *CrHPR4* was greatly induced in both WT/CC-125 and *Crhpr1* strains in air (Fig. 1A and  
280 4A), demonstrating its participation in photorespiration. To uncover its detailed function in  
281 photorespiratory physiology, we generated the *CrHPR4* knockdown strains at WT/CC-125  
282 background, yielding *WT/CC-125-a4*. Both photosynthetic activity and growth of *WT/CC-125-a4*  
283 strains were only slightly affected (Fig. S9), which is consistent with previous study (Burgess et  
284 al., 2015). However, the ratio of Rubisco (oxidation/carboxylation) was detected with a lower  
285 value in *WT/CC-125-a4* strains than that in WT/CC-125 (Table S8), suggesting the relation of  
286 CrHPR4 to photorespiration in some extents. To further explore the possibility, we generated the  
287 *CrHPR4* knockdown strains at *Crhpr1* background, yielding *Crhpr1-a4*. As determined by the  
288 qRT-PCR analysis, a reduced expression level of *CrHPR4* was detected in *Crhpr1-a4* strains (Fig.  
289 4B) and they were used in the following studies.

290 Apparently, the visually enhanced growth was observed for *Crhpr1-a4* strains compared to  
291 that of *Crhpr1* in both solid and liquid medium (Fig. 4C and D). The highly accumulated biomass  
292 of *Crhpr1-a4* possibly resulted from its efficient activity in both photosynthesis and CO<sub>2</sub> fixation  
293 (Fig. 4E, S10; Table S9). Unexpectedly, less glycolate, intermediate in photorespiration, was  
294 excreted by *Crhpr1-a4* than both *Crhpr1* and *Crhpr1-a2* (Fig. 4F), and this prompted us to  
295 investigate whether CrHPR4 still perform functions as HPR. We then examined the enzymatic  
296 activity with cell extracts from respective strains, and determined the difference (Fig. 4G).  
297 Intriguingly, the enzymatic activity of NADH-dependent glyoxylate reductase rather than HPR

298 was significantly impaired/decreased in *Crhpr1-a4* strains compared to that in *Crhpr1* (Fig. 4G).  
299 These evidences established the relationship of CrHPR4 to photorespiration but it may mainly  
300 function as glyoxylate reductase not HPR, and its physiological effects seem to be different from  
301 those of CrHPR1 and CrHPR2.

302 Considering that CrHPR4 was targeted to the chloroplast (Fig. S5), it likely plays roles in the  
303 glycolate-quinone oxidoreductase system which could be inhibited by salicylhydroxamic acid  
304 (SHAM) (Goyal, 2002). To test this possibility, we added SHAM to the medium and found that  
305 the excretion of glycolate was indeed suppressed in *Crhpr1-a4* strains (Fig. 4F). Moreover, the  
306 halted glycolate-quinone oxidoreductase reaction by SHAM resulted in less reactive oxygen  
307 species which is the byproduct of the oxidoreductase system (Fig. 4H), and higher carboxylation  
308 efficiency (Fig. 4I).

309 Together, these results provide the evidence that CrHPR4 may take parts in photorespiration by  
310 acting as the chloroplasdial glyoxylate reductase in the glycolate-quinone oxidoreductase system,  
311 which differentiates it from CrHPR1 and CrHPR2.

312

## 313 **DISCUSSION**

### 314 **The ensemble of CrHPR proteins identified here is previously uncharacterized** 315 **photorespiratory components with hydroxypyruvate reductase**

316 In an effort to identify all the hydroxypyruvate reductase in *Chlamydomonas* genome, we initially  
317 used the BLAST function with the protein sequence of CrHPR1 as reference to search against the  
318 *Chlamydomonas* proteome. The analysis generated a list of 5 candidate novel CrHPRs (including  
319 CrHPR1 itself), in which the conserved domains of HPR, including NAD(P)-binding motif, NAD  
320 recognition sites, substrate-orienting and catalytic pair domains, were identified (Fig. S1 and S2).  
321 Further study of the five CrHPRs by enzymatic assay showed that all five are indeed detected with  
322 the activity of HPR (Table 1). Subcellular localization (Fig. S5) and phenotypic characterization of  
323 respective mutants (Fig. 2, 3 and 4) provide evidences that some of these candidate proteins in fact  
324 act in photorespiration. Thus, we have globally identified the CrHPRs and explore their functions  
325 that were previously unknown.

326

### 327 **CrHPRs are locating in multiple subcellular regions when function in photorespiration**

328 Compared to the higher plants, photorespiration was assumed to pass through the mitochondria  
329 rather than peroxisome in *Chlamydomonas* (Nakamura et al., 2005), which is supported by the  
330 detected mitochondrial CrHPRs activity (Stabenau et al., 1974). Husic further demonstrated that

331 it's NADH-dependent CrHPRs that may function as the major components of HPRs in  
332 photorespiration (Husic and Tolbert, 1987), but not yet known at the sequence level. Here we  
333 identified two mitochondrion-targeting CrHPRs, CrHPR1 and CrHPR5, assayed with  
334 NADH-dependent activity for the first time according to our knowledge (Fig. S5, Table 1), and  
335 they are likely the proteins previously shown to be associated with the photorespiration (Husic and  
336 Tolbert, 1987). Especially CrHPR1, which was experimentally verified with high  
337 NADH-dependent enzymatic activity, may contribute most of the HPR activities measured by  
338 Husic (Husic and Tolbert, 1987). Therefore, it may not be coincidental that *Crhpr1* developed  
339 photorespiratory defects in air (Fig. 2 D, E, F and G). CrHPR5, active in the presence of NADPH,  
340 may have a function related to the glutathione peroxidase or peroxiredoxin antioxidant systems  
341 that need plenty of NADPH converted from NADH.

342 But Husic did not know that there are bypass pathways of photorespiration, a conclusion that  
343 is supported by both previous and present studies (Timm et al., 2008; Timm et al., 2011). In  
344 present study, we found that CrHPR2 and CrHPR4, which are proved to be related to  
345 photorespiration (Fig. 3 and 4), were targeted to cytosol and chloroplast (Fig. S5), respectively.  
346 They may function as such components of the bypass pathway of photorespiration, and it will be  
347 of interest to determine their detailed functions as discussed in the below sections.

348

#### 349 **CrHPR1 acts as the major NADH-dependent HPR in Chlamydomonas, and functions** 350 **differently from HPR1 in higher plants**

351 CrHPR1 was assigned into the plant-specific subgroup in phylogenetics analysis (Fig. S4), and it  
352 has been well inherited through evolution implicated by the presence of homologs in higher plants  
353 (Fig. S1). However, the function of CrHPR1 in photorespiration may be different from its  
354 homologs in higher plants according to the present study.

355 Unlike the peroxisome-location of HPR1 in higher plants, CrHPR1 was targeted to the  
356 mitochondria (Fig. S5), which supports the assumption that photorespiration may pass through  
357 mitochondria rather than peroxisome in *Chlamydomonas* (Nakamura et al., 2005). Further  
358 investigation revealed that *Crhpr1* presented obvious photorespiratory defects and retarded growth  
359 in air (Fig. 2), which are greatly different to the no visually noticeable phenotypes of *hpr1* mutants  
360 in high plants (Timm et al., 2008; Cousins et al., 2011). This leads us to suggest that CrHPR1 acts  
361 as the major NADH-dependent HPR in *Chlamydomonas*, and the roles of CrHPR1 in  
362 photorespiration seems to be much more dominant than that of HPR1 in higher plants. Apparently,  
363 the cytosolic or chloroplast bypass pathway of photorespiration (Fig. 3 and 4), performed by  
364 CrHPR2 and CrHPR4, could not fully compensate the lost function of mitochondrial CrHPR1.

365 Therefore, the novel phenotypes of *Crhpr1* described here expand the range of HPRs' phenotypes  
366 associated with photorespiratory defects.

367 In the course of analysis, we also noticed that *Chlamydomonas* and high plants responses  
368 differently to the photorespiratory defects. In *Arabidopsis*, 2-phosphoglycolate is accumulated and  
369 metabolized by G6P shunt in *hpr1* mutant (Li et al., 2019), and hydroxypyruvate is converted into  
370 glycolate after decarboxylation and oxidation, then glycolate reenters the core photorespiration  
371 pathway (Missihoun and Kotchoni, 2018). However, the *Crhpr1* mutant excretes a large amount of  
372 glycolate to balance the internal environment (Fig. 2G), which resulted in the greatly reduced  
373 efficiency of carbon fixation. It's likely that more complex photorespiration and adaption  
374 mechanisms have been adopted during evolution, but the underlying cause of the difference  
375 between *Chlamydomonas* and higher plants remains to be clarified.

376

### 377 **CrHPR2 participates in the cytosolic bypass of photorespiration**

378 The general assumption that conversion of hydroxypyruvate to glycerate is exclusively performed  
379 by the mitochondria- or peroxisome-targeted HPR1 may not be comprehensive (Timm et al., 2008;  
380 Timm et al., 2011; Ye et al., 2014; Missihoun and Kotchoni, 2018), considering that HPR2 could  
381 participate in the cytosolic bypass of photorespiration in both *Chlamydomonas* and higher plants  
382 (Table 1, Fig. 3; Timm et al., 2008). Our determination of the functions of CrHPR2 in  
383 photorespiration is based on evidence from several aspects as follows.

384 In our initial analysis, we found that CrHPR2 was assigned into the bacterial subgroup, which  
385 suggests that its participation may not be limited to the light-related metabolism (Fig. S4). To  
386 further investigate its function, we generated the CrHPR2 knockdown strains at WT/CC-125  
387 background, but no obvious photorespiratory defect was observed (Fig. S7). Only when CrHPR2  
388 was knocked down in *Crhpr1*, the more severe photorespiratory defects of *Crhpr1-a2* could be  
389 detected than those of *Crhpr1* (Fig. 3). These evidences imply the participation of CrHPR2 in  
390 photorespiration, but it may play a compensatory role in some extent, which is supported by the  
391 result from qRT-PCR analysis (Fig. 3A). If so, these evidences mentioned above support the  
392 permeability of mitochondria matrix for hydroxypyruvate. Thus, our data provide indirect  
393 evidence that hydroxypyruvate could easily equilibrate with cytosol when no CrHPR1 is present  
394 within the mitochondria. Despite it remains to be examined the presence of suggested  
395 mitochondria channeling of photorespiratory intermediates HP (Keech et al., 2017), it is not  
396 unlikely that such equilibration mentioned above occurs in WT/CC-125.

397 Last but not least, it is of importance to build the interaction network of cytosolic CrHPR2,  
398 which would provide more details of CrHPR2 in both photorespiration and other metabolic

399 pathways. What's more, CrHPR3 was also localized to cytosol but did not show a similar function  
400 to that of CrHPR2. How CrHPR2 and CrHPR3 coordinate with each other in the cytosolic bypass  
401 of photorespiration remains to be explored.

402

403 **CrHPR4, targeted to the chloroplast, mainly plays roles in photorespiration as glyoxylate**  
404 **reductase within this compartment**

405 Here, we report to our knowledge a previously uncharacterized enzyme that could reduce HP,  
406 glyoxylate and pyruvate (Table 1), and hence could directly or indirectly contribute to  
407 photorespiration in *Chlamydomonas*. Considering its multiple substrates and preference for the  
408 cofactor NADH, the identified CrHPR4 could support mitochondrial and cytosolic CrHPRs as  
409 well as chloroplastidial and cytosolic glyoxylate reductase (Ching et al., 2012; Briki et al., 2017)  
410 for an optimal reduction of the respective intermediates (Fig. 1). Therefore, the observed effects of  
411 CrHPR4 on photorespiration clearly suggest its involvement in this process (Fig. 4).

412 By combining the data of enzymatic characteristics and the analysis of *Crhpr1-a4* strains, we  
413 proposed the detailed mechanism for *CrHPR4* participating in photorespiration as shown in Fig. 5:  
414 CrHPR4 was detected with the activity of glyoxylate reductase (Table 1), and it may act in the  
415 glycolate-quinone oxidoreductase system which is supported by the results presented in Fig. 5.  
416 When *CrHPR4* is knocked down in *Crhpr1*, excess glyoxylate is converted into CO<sub>2</sub> which  
417 directly inhibits the oxidation reaction of Rubisco while promoting the carboxylation reaction (Fig.  
418 4E, Table S10). Meanwhile, the production of glycolate mediated by CrHPR4 is greatly disrupted  
419 in *Crhpr1-a4* strains, resulting in the less excretion of glycolate into medium (Fig. 4F). Together,  
420 the knockdown of CrHPR4 results in the increased CO<sub>2</sub> fixation and less loss of photosynthetic  
421 fixed carbon (Fig. 4H and I). As a result, *Crhpr1-a4* was observed with more robust growth  
422 compared to *Crhpr1* (Fig. 4C and D). Considering the great effects of CrHPR4 on the conversion  
423 of glyoxylate into glycolate, it may function as the dominant glyoxylate reductase in chloroplast.  
424 It's undeniable that CrHPR4 have linked the photosynthesis and photorespiration closely via the  
425 glycolate metabolism, and the fine-tuning mechanism remains unidentified yet.

426 Interestingly, CrHPR4 was detected with the activity of pyruvate reductase which is  
427 consistent with previous study (Burgess et al., 2015). As pyruvate reductase, CrHPR4, however,  
428 may mainly play an important role in anaerobic/fermentation metabolism (Burgess et al., 2015). It  
429 seems likely that CrHPR4 could participate in both photorespiration and anaerobic metabolism by  
430 acting as a bifunction enzyme, but how CrHPR4 performs roles in two pathways remains to be  
431 identified. Thus, the investigation of interaction network of CrHPR4 in chloroplast could provide  
432 more details. Moreover, CrHPR4 was also detected with the activity of HPR, but how HP is

433 transported from mitochondrion to chloroplast is not identified yet (Reumann and Weber, 2006;  
434 Keech et al., 2017). Thus, it would be very informative to analyze and compare the “-omics” of  
435 *Crhpr1-a4* under photorespiratory and non-photorespiratory conditions as fermentation, to  
436 uncover its elusive functions and exact physiological role.

437 In conclusion, although the role for CrHPR4 will need further investigation, this study  
438 presents strong indications that the enzyme is closely associated with the photorespiratory process  
439 and can at least partially participate in the chloroplast glycolate metabolism. Moreover, CrHPR4  
440 could display a possible link of photorespiration to photosynthesis and fermentation that remains  
441 to be identified. It’s particularly important to clarify the underlying mechanism of CrHPR4  
442 functioning in multiple pathways, and it will benefit both the construction of plant metabolic  
443 network and the crop improvement by synthetic biology.

444

#### 445 **Concluding remarks**

446 Our results reveal that the CrHPRs are far more complex than previously recognized, and provide  
447 a greatly expanded knowledge base to understand their functions in photorespiration for future  
448 study. Considering the presence of multiple CrHPRs in *Chlamydomonas* genome and phenotypes  
449 of the mutants, it will be of great interest to uncover the detailed mechanism of how they  
450 coordinate with each other when performing roles in photorespiration.

451 CrHPRs could link photorespiration to photosynthesis and fermentation, and they may act  
452 as the central hub in the coordination of metabolism. Hence, the studies here will benefit the  
453 construction of plant metabolic network, and provide important clues for crop improvement by  
454 genetic engineering. Meanwhile, glycolate could be converted into methane (Günther et al., 2012),  
455 and it will be of interest to explore the potentiality of develop glycolate into bioenergy.

456

457

## 458 **MATERIALS AND METHODS**

### 459 **Strains and culture conditions**

460 All *Chlamydomonas* strains used in the work are listed in Table S1. WT strain used was CC-125  
461 (*Chlamydomonas* Resource Center, <https://www.chlamycollection.org>). The mutant *hpr1* was  
462 generated as previously described (Cheng et al., 2017) and obtained from the Wu Han Jingyu  
463 Microalgae Science CO., LTD, China. AmiRNA mutants was generated as previously described  
464 (Hu et al., 2014).

465 *Chlamydomonas* cells were maintained in solid Tris-acetate-phosphate (TAP) plates, and  
466 cultured in liquid Tris-minimal medium (Gorman and Levine, 1965) at 25 °C under 80  $\mu\text{E m}^{-2} \text{s}^{-1}$

467 continuous light. For high CO<sub>2</sub> treatment, cells were grown in Tris-minimal medium with aeration  
468 of 3% CO<sub>2</sub>.

469

#### 470 **qRT-PCR analysis**

471 Total mRNAs used for qRT-PCR experiments were isolated from *Chlamydomonas* using the  
472 Easstep Super total RNA extraction kit (Promega), and cDNA was synthesized with the  
473 PrimeScript TMRT Master Mix kit (TaKaRa). qRT-PCR reactions were performed in triplicate  
474 using Mastercycler ep realplex (Eppendorf) with gene-specific primers and actin as the internal  
475 control (Winck et al., 2016). Gene-specific PCR primer pairs used for the actin and CrHPRs are  
476 listed in Table S2. PCR primers were designed using Primer-BLAST of NCBI  
477 ([https://www.ncbi.nlm.nih.gov/tools/primer-blast/index.cgi?LINK\\_LOC=BlastHome](https://www.ncbi.nlm.nih.gov/tools/primer-blast/index.cgi?LINK_LOC=BlastHome)) and the  
478 amplifying program was as follows: pre-incubation at 95 °C for 30 s, 40 cycles of denaturation at  
479 95 °C for 5 s, annealing at 62 °C for 5 s, and amplification at 72 °C for 25 s.

480 The change in fluorescence of SYBR Green I dye (SYBR Premix Ex Taq, TaKaRa) in every  
481 cycle was monitored by the realplex system software, and the cycle threshold (C<sub>t</sub>) above  
482 background for each reaction was calculated. The C<sub>t</sub> value of actin was subtracted from that of the  
483 gene of interest to obtain a  $\Delta C_t$  value. The C<sub>t</sub> value of an arbitrary calibrator was subtracted from  
484 the  $\Delta C_t$  value to obtain a  $\Delta\Delta C_t$  value. The fold changes in expression level relative to the  
485 calibrator were calculated as  $2^{-\Delta\Delta C_t}$ .

486

#### 487 **Gene cloning, heterologous expression of *Chlamydomonas* HPR and purification of** 488 **recombinant proteins**

489 *Chlamydomonas* cDNA samples were prepared as described above. HPR cDNAs were amplified  
490 using PrimeSTAR HS DNA Polymerase (Takara, Ohtsu, Japan) with gene-specific primers as  
491 listed in Table S3. The PCR product was cloned directly into pMD20-T vector (Takara, Beijing,  
492 China), which was then transformed into competent *E. coli* DH5 $\alpha$  cells. Positive clones were  
493 verified by sequencing (BGI Genomics, Beijing, China).

494 For heterologous expression, the plasmids containing HPR2 were digested with *Nco*I and *Xho*I  
495 and the resulted fragment was linked to pETMALc-H treated with the same restricted enzymes  
496 (Kellyann et al., 1997), yielding pETMALc-H-HPR2. The plasmids containing CrHPR1, CrHPR3,  
497 CrHPR4 and CrHPR5 were digested with *Nde*I and *Xho*I, respectively, and then ligated into  
498 pET-30a digested with the same enzymes, yielding pET-30a-CrHPR1, pET-30a-CrHPR3,  
499 pET-30a-CrHPR4, pET-30a-CrHPR5. The constructed expression plasmids were transformed into  
500 expression host *E. coli* Rosetta (DE3) (CoWin Biosciences, Beijing, China), and the transformants



501 were cultivated in the autoinduction medium ZYM2052 (Studier, 2005).

502 The recombinant HPRs was purified with HIS-Select nickel affinity gel filler (CoWin  
503 Biosciences, Beijing, China). Briefly, the supernatant of the broken cells collected and gently  
504 mixed with HIS-Select nickel affinity gel, and washed up by three cycles of binding buffer. The  
505 His-tagged HPRs was eluted with elution buffer.

506

### 507 **Generation of amiRNA, overexpression and CrHPR-CFP cell lines**

508 For generation of amiRNA cell lines, pHK460 vector was given from Kaiyao Huang (Institute of  
509 hydrobiology, Chinese academy of sciences) (Nordhues et al., 2012). Target gene-specific  
510 oligonucleotide sequences were designed using the WMD3 software  
511 (<http://wmd3.weigelworld.org>). The resulting oligonucleotides that target CrHPR2 and CrHPR4  
512 genes are listed in Table S4. Combined with the sequence of miRNA cre-MIR1157, these  
513 oligonucleotides were linked into pHK460 vector at the unique *Xho*I and *Eco*RI site. The plasmids  
514 were then isolated and subjected to transformation into Chlamydomonas cells.

515 For generation of overexpression cell lines, CrHPR1 were cloned from Chlamydomonas cDNA  
516 samples with gene-specific primers (*Crhpr1*-O-F/R) as in Table S3. The PCR product was  
517 connected into pMD20-T vector (Takara, Beijing, China) to form pMD20-CrHPR1, which was  
518 then transformed into competent *E. coli* DH5 $\alpha$  cells. Positive clones were verified by sequencing  
519 (BGI Genomics, Beijing, China). The plasmid pMD20-CrHPR1 was digested with *Xho*I and  
520 *Eco*RI and the resulted fragment was linked to pHK460 treated with the same restricted enzymes.  
521 The mRNA from pHK460 is expressed from the hsp70/rbcs2 promoter and end at 3'UTR of /rbcs2.  
522 The transcript protein is fused with zeocin resistance selection maker, which will be cut off by the  
523 FMDV 2A self-cleaving sequence (Nordhues et al., 2012).

524 The constructed plasmids were transformed into Chlamydomonas cells using the  
525 electroporation method as described (Rasala et al., 2012). After transformation, cells were grown  
526 on Tris-acetate-phosphate agar supplemented with 15  $\mu$ g/mL zeocin (Sigma-Aldrich). Colonies  
527 derived from single cells were picked for DNA extraction, after digested with RNase, Colonies  
528 were confirmed by PCR with primers (*Crhpr1*-O-F/R) to amplify the stripe which length is same  
529 as cDNA of CrHPR1.

530 For generation of CrHPR-CFP cell lines, CrHPRs were cloned from Chlamydomonas cDNA  
531 samples with gene-specific primers (CrHPRs-NT-F/R for testing N-terminal target signal and fuse  
532 the CFP to C-terminal of CrHPRs; CrHPRs-CT-F/R for testing C-terminal target signal and fuse  
533 the CFP to N-terminal of CrHPRs) as in Table S3. The PCR products were connected into  
534 pMD20-T vector (Takara, Beijing, China) to form pMD20-CrHPRs-NT or pMD20-CrHPRs-CT,



535 and transformed into competent *E. coli* DH5 $\alpha$  cells. Positive clones were verified by sequencing  
536 (BGI Genomics, Beijing, China). The plasmid pMD20-CrHPRs-NT was digested with *Xho*I and  
537 *Bam*HI, and the plasmid pMD20-CrHPRs-CT was digested with *Bam*HI and *Eco*RI, then the  
538 resulted fragment was linked to pHK460 treated with the same restricted enzymes.

539 The plasmids were then isolated and subjected to transformation into *Chlamydomonas* cells.  
540 Transformants were selected from TAP plates supplemented with 15  $\mu$ g/mL zeocin  
541 (Sigma-Aldrich).

542

#### 543 **Fluorescence microscopy**

544 Representative cells were collected from TAP plates supplemented with zeocin. Images were  
545 captured on Image-Pro Express 6.0 (Media Cybernetics, Rockville, MD, USA) using Olympus  
546 BX51 (Center Valley, PA, USA) with Retiga-2000R camera (QImaging, Tucson, AZ, USA).  
547 Filters used in this research are CFP (excitation 436/10 nm, emission 470/30 nm) and Chloro  
548 (excitation 500/23 nm, emission 535/30 nm). The fluorescence images were false-colored using  
549 Adobe Photoshop CS3.

550

#### 551 **Enzymatic activity assays**

552 Cells were collected and broken in 1 mL extraction buffer (10 mM Tris-HCl, 1 mM EDTA, 2  
553 mM MgCl<sub>2</sub>, 1mM  $\beta$ -mercaptoethanol, pH 7.5), and the supernatant was collected for the  
554 determination of enzymatic activity after centrifugation at 4 °C. With 0.2 mM NADPH, 0.5 mM  
555 hydroxypyruvate or 1 mM glyoxylate, and 50  $\mu$ L purified enzyme in 200mM sodium phosphate  
556 buffer (pH 6.5), The hydroxypyruvate and glyoxylate reductase activity was determined according  
557 to published procedures (Husic and Tolbert, 1987) by measuring the absorbance of NAD(P)H at  
558 340 nm using Microplate Photometer (Thermo-FC) at 25 °C. The protein concentration was  
559 measured by Bradford method.

560

#### 561 **Chlorophyll fluorescence measurement**

562 Cells were immobilized, aiming to acquire accurate data, as described by Luz with modification  
563 (Luz et al., 2015). Briefly, cells were cultured in Tris-minimal medium, and collected when  
564 reached to the late logarithmic phase. Then the cells were washed with 0.85% (w/v) NaCl, and  
565 concentrated by 12 times. 2 mL of the concentrated cells were mixed with 8 mL of 2% sodium  
566 alginate solution. The 4 cm<sup>2</sup> squares of monofilament nylon with 24 threads per inch was  
567 sterilized, and immersed into the above mixture. The monofilament nylon square was quickly  
568 transferred into 2% CaCl<sub>2</sub> solution to solidify sodium alginate. The monofilament nylon squares

569 were rinsed with 0.85% NaCl to remove excess solution. The above steps were repeated once  
570 again to get two layers of cell immobilized sodium alginate onto the squares.

571 The immobilized cells were clipped with DLC-8 dark leaf clip and measured by MINI-PAM-II  
572 (Walz, Germany) with the saturation pulse method by following the manufacturer's instruction  
573 (Klughammer and Schreiber, 1994). Briefly, with the saturation pulse technique, the maximum  
574 quantum efficiency of PSII (Fv/Fm) was detected after 30 min dark acclimated. The light curves  
575 were generated by using increasing actinic irradiance sequence ranging from 0 to 500  $\mu\text{mol}$   
576 photons  $\text{m}^{-2}\text{s}^{-1}$ .

577

### 578 **Measurement of photosynthetic and respiration rates**

579 Cells at late logarithmic phase ( $3\sim 5\times 10^6$  cells/mL) were collected and concentrated by 5 times.  
580 The oxygen exchange was measured with a Chlorolab-2 oxygen electrode (Hansatech, Norfolk,  
581 UK) at 30 °C under both dark and light conditions by following the manufacturer's instructions.  
582 Light intensity was determined using a quantum photometer (Hansatech).  
583 The electron flow of Rubisco was calculated by combining the data of oxygen exchange and  
584 chlorophyll fluorescence (Valentini et al., 1995). Formula:  $J_c = 1/3[\text{ETR}_{II} + 8(A + R_D)]$ ,  $J_o =$   
585  $2/3[\text{ETR}_{II} - 4(A + R_D)]$ ,  $J_c$ : the electron flux of Rubisco carboxylation;  $J_o$ : the electron flux of  
586 Rubisco oxygenation; A: net photosynthetic rate;  $R_D$ : day respiration.

587

### 588 **Quantitative measurement of ROS**

589 The ROS of cells were measured by Reactive Oxygen Species Assay Kit (Beyotime Institute  
590 of Biotechnology, Shanghai, China) following the manufacturer's instructions. Briefly, Cells at  
591 late logarithmic stage were collected, and stained with 100  $\mu\text{M}$  2',7'-dichlorofluorescein diacetate  
592 ( $\text{H}_2\text{DCF-DA}$ ) for 45 min at room temperature as described previously (Affenzeller et al., 2009).  
593 Then cells were washed 3 times with Tris-minimal medium to remove the unbound probes and  
594 resuspend in 1mL Tris-minimal medium. The cells mixture was measured by fluorescence  
595 spectrophotometer (Enspire, PerkinElmer LLC, US) by using 485 nm excitation and 530 nm  
596 emission.

597

### 598 **Glycolate Determination**

599 Cells were collected at late logarithmic phase and added to new Tris-minimal medium to  
600 make the final concentration reach at  $2\times 10^6$  cells/mL. After 48 hours, glycolate was detected from  
601 the supernatant according to Kenji's method (Takahashi, 1972). Samples containing 0.1 to 10  $\mu\text{g}$   
602 glycolate were used to draw the standard curve. 50  $\mu\text{L}$  samples were added to the test tube with

603 1mL 0.01% 2,7-dihydroxynaphthalene in concentrated sulfuric acid. After 20min of 100°C water  
604 bath, the mixture was measured by Microplate Photometer (Thermo-FC) at 540 nm.

605

#### 606 **Bioinformatic analysis**

607 To identify the Chlamydomonas HPR proteins, CrHPR1 protein sequence was searched against  
608 the *C. reinhardtii* predicted protein database in Phytozome 12 using the BLASTP function,  
609 searched against the HMMER *C. reinhardtii* reference proteome using the HMMER website  
610 service (<https://www.ebi.ac.uk/Tools/hmmer/search/phmmer>) with the default parameters, or  
611 searched against AlgaePath ([http://algaepath.itps.ncku.edu.tw/algae\\_path/home.html](http://algaepath.itps.ncku.edu.tw/algae_path/home.html)). Protein  
612 alignments were performed using ClustalW (Larkin et al., 2007) and viewed using the GeneDoc  
613 software (Nicholas et al., 1997). The maximum likelihood phylogenetic tree was produced using  
614 the MEGA 7 program (Kumar et al., 2015).

615

616

#### 617 **ACKNOWLEDGMENTS**

618 We are grateful to Dr. K.Y. Huang from the Institute of Hydrobiology, Chinese Academy of  
619 Sciences for his generous gift of plasmid and technical guidance of electroporation method.

620 This work was supported by grant from Tianjin Synthetic Biotechnology Innovation Capacity  
621 Improvement Project (TSBICIP-CXRC-027) to L.Z.

622 The authors declare no competing financial interests.

623

624

#### 625 **AUTHOR CONTRIBUTIONS**

626 M.L.S., L.Z. and Y.W. conceived the project; M.L.S. performed the experiments; M.L.S., L.Z.  
627 and Y.W. analyzed the data, wrote, and revised the manuscript; All the authors have read and  
628 approved the manuscript prior to submission.

629

630 **REFERENCE**

- 631 Affenzeller MJ, Darehshouri A, Andosch A, Lütz C, Lütz-Meindl U (2009) Salt stress-induced  
632 cell death in the unicellular green alga *Micrasterias denticulata*. *J Exp Bot.* 60(3):939-954.
- 633 Bauwe H, Hagemann M, Kern R, Timm S: Photorespiration has a dual origin and manifold links  
634 to central metabolism. *Curr Opin Plant Biol* 2012, 15:269-275.
- 635 Brikis Carolyne J., Zarei Adel, Trobacher Christopher P., DeEll Jennifer R., Akama Kazuhito,  
636 Mullen Robert T., Bozzo Gale G., Shelp Barry J. (2017) ncient Plant Glyoxylate/Succinic  
637 Semialdehyde Reductases: GLYR1s Are Cytosolic, Whereas GLYR2s Are Localized to Both  
638 Mitochondria and Plastids. *Frontiers in Plant Science* 8: 601
- 639 Brueggeman, A.J., Gangadharaiah, D.S., Cserhati, M.F., Casero, D., Weeks, D.P. and Ladunga, I.  
640 (2012) Activation of the carbon concentrating mechanism by CO<sub>2</sub> deprivation coincides with  
641 massive transcriptional restructuring in *Chlamydomonas reinhardtii*. *Plant Cell* 24: 3483.
- 642 Burgess, S. J., Taha, H., Yeoman, J. A., Iamshanova, O., Chan, K. X., Boehm, M., ... Nixon, P. J.  
643 (2015) Identification of the Elusive Pyruvate Reductase of *Chlamydomonas reinhardtii*  
644 Chloroplasts. *Plant and Cell Physiology* 57(1): 82–94.
- 645 Cheng X, Liu G, KeW, et al. (2017) Building a multipurpose insertionalmutant library for forward  
646 and reverse geneticsin *Chlamydomonas*. *Cheng et al. Plant Methods* 13:36
- 647 Ching, S L K, Gidda, S K, et al. (2012) Glyoxylate Reductase Isoform 1 is Localized in the  
648 Cytosol and Not Peroxisomes in Plant Cells. *Journal of Integrative Plant Biology*  
649 54(3):152-168.
- 650 Cousins AB, Pracharoenwattana I, Zhou W, Smith SM, Badger MR. (2008) Peroxisomal malate  
651 dehydrogenase is not essential for photorespiration in *Arabidopsis* but its absence causes an  
652 increase in the stoichiometry of photorespiratory CO<sub>2</sub> release. *Plant Physiol.* 148(2):786-95.
- 653 Cousins AB, Walker BJ, Pracharoenwattana I, et al. (2011) Peroxisomal hydroxypyruvate  
654 reductase is not essential for photorespiration in *Arabidopsis* but its absence causes an  
655 increase in the stoichiometry of photorespiratory CO<sub>2</sub> release, *Photosynth Res* 108:91–100
- 656 Douce R, Heldt HW (2000) Photorespiration. In RC Leegood, S von Caemmerer, T Sharkey, eds,  
657 *Photosynthesis: Physiology and Mechanisms*. Kluwer, Dordrecht, The Netherlands, pp  
658 115–136
- 659 Du ZY, Lucker BF, Zienkiewicz K, Miller TE, Zienkiewicz A, Sears BB, Kramer DM, Benning C.  
660 (2018) Galactoglycerolipid Lipase PGD1 Is Involved in Thylakoid Membrane Remodeling in  
661 Response to Adverse Environmental Conditions in *Chlamydomonas*. *Plant Cell.*  
662 30(2):447-465.
- 663 Eisenhut M, Roell MS, Weber APM. (2019) Mechanistic understanding of photorespiration paves  
664 the way to a new green revolution. *New Phytol.* 223(4):1762-1769.
- 665 Gorman, D.S. and Levine, R.P. (1965) Cytochrome f and plastocyanin: their sequence in the  
666 photosynthetic electron transport chain of *Chlamydomonas reinhardtii*. *Proceedings of the*  
667 *National Academy of Sciences of the United States of America* 54: 1665-1669.
- 668 Gould, S. G., Keller, GA., and Subramani, S. (1987) Identification of a peroxisomal targeting  
669 signal at the carboxy terminus of firefly luciferase. *The Journal of Cell Biology,*  
670 105:2923-2931.
- 671 Goyal, A. (2002) Glycolate metabolism in algal chloroplasts: inhibition by salicylhydroxamic acid  
672 (SHAM). *Physiologia Plantarum* 116(2): 264-270.
- 673 Greenler, J.M., Sloan, J.S., Schwartz, B.W. and Becker, W.M. (1989) Isolation, characterization  
674 and sequence analysis of a full-length cDNA clone encoding NADH-dependent  
675 hydroxypyruvate reductase from cucumber. *Plant Mol. Biol.* 13: 139-150.

- 676 Griffiths, H. Designs on Rubisco. *Nature* (2006)441(7096), 940–941.
- 677 Günther, A., Jakob, T., Goss, R., König, S., Spindler, D., Rübiger, N., John, S. et al. (2012)
- 678 Methane production from glycolate excreting algae as a new concept in the production of
- 679 biofuels. *Biores. Technol.* 121: 454–457.
- 680 Hagemann M and Bauwe H et al. (2016) Photorespiration and the potential to improve
- 681 photosynthesis. *Current Opinion in Chemical Biology*, 35:109–116
- 682 Hayashi, M., Tsugeki, R., Kondo, M., Mori, H. and Nishimura, M. (1996) Pumpkin
- 683 hydroxypyruvate reductases with and without a putative C-terminal signal for targeting to
- 684 microbodies may be produced by alternative splicing. *Plant Mol. Biol.* 30: 183-189.
- 685 Hu J, Deng X, Shao N, et al. (2014) Rapid construction and screening of artificial microRNA
- 686 systems in *Chlamydomonas reinhardtii*. *The Plant Journal*, 79: 1052–1064.
- 687 Husic.DW, Tolbert NE, (1987) NADH:hydroxypyruvate reductase and NADPH:glyoxylate
- 688 reductase in algae: Partial purification and characterization from *Chlamydomonas reinhardtii*,
- 689 *Arch Biochem Biophys.* Feb 1;252(2):396-408.
- 690 Keech, O., Gardeström, P., Kleczkowski, L. A., and Rouhier, N. (2017) The redox control of
- 691 photorespiration: from biochemical and physiological aspects to biotechnological
- 692 considerations. *Plant, Cell & Environment*, 40: 553– 569.
- 693 Kellyann D. Pryor, Barbara Leiting. (1997) High-Level Expression of Soluble Protein in
- 694 *Escherichia coli* Using a His6-Tag and Maltose-Binding-Protein Double-Affinity Fusion
- 695 System. *Protein Expression and Purification* (10): 1046-5928.
- 696 Kleczkowski LA, Edwards GE, Blackwell RD, Lea PJ, Givan CV (1990) Enzymology of the
- 697 reduction of hydroxypyruvate and glyoxylate in a mutant of barley lacking peroxisomal
- 698 hydroxypyruvate reductase. *Plant Physiol* 94: 819–825
- 699 Kleczkowski LA, Randall DD. (1988) Purification and characterization of a novel
- 700 NADPH(NADH)-dependent hydroxypyruvate reductase from spinach leaves. Comparison of
- 701 immunological properties of leaf hydroxypyruvate reductases. *Biochem J.* 250(1):145-52.
- 702 Kleczkowski LA, Randall DD, Edwards GE. (1991) Oxalate as a potent and selective inhibitor of
- 703 spinach (*Spinacia oleracea*) leaf NADPH-dependent hydroxypyruvate reductase. *Biochem J.*
- 704 276:125-7.
- 705 Klughammer, C., Schreiber, U., (1994). An improved method, using saturating light pulses, for the
- 706 determination of photosystem I quantum yield via P700+ -absorbance changes at 830nm.
- 707 *Planta* 192: 261–268.
- 708 Kumar S, Stecher G, and Tamura K (2015) MEGA7: Molecular Evolutionary Genetics Analysis
- 709 version 7.0 for bigger datasets. *Molecular Biology and Evolution* 33(7): 1870-1874.
- 710 Kutner, J., Shabalin, I. G., Matelska, D., Handing, K. B., Gasiorowska, O., Sroka, P., ... Minor, W.
- 711 (2018). Structural, Biochemical, and Evolutionary Characterizations of
- 712 Glyoxylate/Hydroxypyruvate Reductases Show Their Division into Two Distinct
- 713 Subfamilies. *Biochemistry*, 57(6): 963–977.
- 714 Larkin, M.A., Blackshields, G., Brown, N.P., Chenna, R., McGettigan, P.A., McWilliam, H., et al.
- 715 (2007) Clustal W and Clustal X version 2.0. *Bioinformatics* 23: 2947–2948.
- 716 Lassalle, L., Engilberge, S., Madern, D., Vauclore, P., Franzetti, B., & Girard, E. (2016). New
- 717 insights into the mechanism of substrates trafficking in Glyoxylate/Hydroxypyruvate
- 718 reductases. *Scientific Reports*, 6(1): 20629.
- 719 Li J, Weraduwege S M, Peiser A L, et al. (2019) A Cytosolic Bypass and G6P Shunt in Plants
- 720 Lacking Peroxisomal Hydroxypyruvate Reductase. *Plant Physiology* 180: 783-792.
- 721 Luz E. de-Bashan, Juan Pablo Hernandez, and Yoav Bashan (2015) Interaction of *Azospirillum*

- 722 spp. with Microalgae: A Basic Eukaryotic-Prokaryotic Model and Its Biotechnological  
723 Applications. Springer International Publishing Switzerland.20:367-388
- 724 Mano S, Hayashi M, Kondo M, Nishimura M. (1997) Hydroxypyruvate reductase with a  
725 carboxy-terminal targeting signal to microbodies is expressed in Arabidopsis. *Plant Cell*  
726 *Physiol.* 38(4):449-55.
- 727 Mano S, Hayashi M, and Nishimura M (2000) A leaf-peroxisomal protein, hydroxypyruvate  
728 reductase, is produced by light-regulated alternative splicing. *Cell Biochem Biophys.*  
729 32:147-54.
- 730 Martin W.F., Garg S., Zimorski V. (2015) Endosymbiotic theories for eukaryote origin. *Philos.*  
731 *Trans. R. Soc. Lond B Biol. Sci.* 370: 1678
- 732 Missihoun T D, Kotchoni S O. (2018) Aldehyde Dehydrogenases and the Hypothesis of a  
733 Glycolaldehyde Shunt Pathway of Photorespiration. *Plant signaling & behavior* 13(3):1-10.
- 734 Murray, A.J.S., Blackwell, R.D., and Lea, P.J. (1989). Metabolism of hydroxypyruvate in a  
735 mutant of barley lacking NADH-dependent hydroxypyruvate reductase, an important  
736 photorespiratory enzyme activity. *Plant Physiol.* 91: 395–400.
- 737 Nakamura, Y., Kanakagiri, S., Van, K., He, W. and Spalding, M.H. (2005) Disruption of the  
738 glycolate dehydrogenase gene in the high-CO<sub>2</sub>-requiring mutant HCR89 of *Chlamydomonas*  
739 *reinhardtii*. *Can. J. Bot.* 83: 820–833.
- 740 Nicholas, K.B., Nicholas, H.B.Jr. and Deerfield, D.W.II. (1997) GeneDoc: analysis and  
741 visualization of genetic variation. *Embnew News* 4: 14.
- 742 Nordhues, A., Schottler, M.A., Unger, A.-K. et al. (2012) Evidence for a role of VIPP1 in the  
743 structural organization of the photosynthetic apparatus in *Chlamydomonas*. *Plant Cell* 24:  
744 637–659.
- 745 Ort DR, Merchant SS, Alric J, Barkan A, Blankenship RE, Bock R, Croce R, Hanson MR,  
746 Hibberd JM, Long SP et al. (2015) Redesigning photosynthesis to sustainably meet global  
747 food and bioenergy demand. *Proc Natl Acad Sci USA* 112:8529-8536.
- 748 Rasala, B.A., Lee, P.A., Shen, Z., Briggs, S.P., Mendez, M. and Mayfield, S.P. (2012) Robust  
749 expression and secretion of xylanase1 in *Chlamydomonas reinhardtii* by fusion to a selection  
750 gene and processing with the FMDV 2A peptide. *PLoS ONE*, 7, e43349.
- 751 Reumann, S., and Weber, A.P. (2006). Plant peroxisomes respire in the light: Some gaps of the  
752 photorespiratory C<sub>2</sub> cycle have become filled others remain. *Biochim. Biophys. Acta* 1763:  
753 1496–1510.
- 754 Schwartz BW, Daniel SG, Becker WM. (1992) Photooxidative Destruction of Chloroplasts Leads  
755 to Reduced Expression of Peroxisomal NADH-Dependent Hydroxypyruvate Reductase in  
756 Developing Cucumber Cotyledons. *Plant Physiol.* 99(2):681-5.
- 757 Somerville CR. (2001) An early Arabidopsis demonstration. Resolving a few issues concerning  
758 photorespiration. *Plant Physiol* 125:20-24.
- 759 Stabenau H (1974) Distribution of microbody enzymes from *Chlamydomonas* on sucrose  
760 gradients, *Planta.* Mar;118(1):35-42.
- 761 Studier, F. W. (2005) Protein production by auto-induction in high-density shaking cultures.  
762 *Protein Expr. Purif.* 41, 207–234
- 763 Swinkels, B.W., Gould, S.J., Bodnar, A.G., Rachubinski, R.A., Subramani, S. (1991) A novel,  
764 cleavable peroxisomal targeting signal at the amino-terminus of the rat 3-ketoacyl-CoA  
765 thiolase, *EMBO J.* 10: 3255–3262,
- 766 Takahashi, Kenji. (1972). A Colorimetric Method for Quantitative Determination of Glycolic Acid  
767 with 2, 7- Dihydroxynaphthalene. *Journal of Biochemistry.* 71. 563-565.

- 768 Tcherkez G. (2013) Is the recovery of (photo) respiratory CO<sub>2</sub> and intermediates minimal? New  
769 *Phytol* 198:334-338.
- 770 Timm S, Florian A, Jahnke K, et al. (2011) The Hydroxypyruvate-Reducing System in  
771 *Arabidopsis*: Multiple Enzymes for the Same End. *Plant Physiology*, 155(2):694-705.
- 772 Timm S, NunesNesi A, Pärnik T, Morgenthal K, Wienkoop S, Keerberg O, Weckwerth W,  
773 Kleczkowski LA, Fernie AR, Bauwe H (2008) A cytosolic pathway for the conversion of  
774 hydroxypyruvate to glycerate during photorespiration in *Arabidopsis*. *Plant Cell* 20:  
775 2848–2859
- 776 Titus DE, Hondred D, Becker WM. (1983) Purification and characterization of hydroxypyruvate  
777 reductase from cucumber cotyledons. *Plant Physiol.* 72(2):402-8.
- 778 Valentini, R., Epron, D., Deangelis, P., Matteucci, G., Dreyer, E. (1995) In-situ estimation of net  
779 CO<sub>2</sub> assimilation, photosynthetic electron flow and photorespiration in Turkey oak (*Q-Cerris*  
780 *L*) leaves – diurnal cycles under different levels of water-supply. *Plant Cell Environ.* 18:  
781 631–640.
- 782 Winck FV, Melo DO, Riaño-Pachón DM, Martins MC, Caldana C, Barrios AF. (2016) Analysis  
783 of Sensitive CO<sub>2</sub> Pathways and Genes Related to Carbon Uptake and Accumulation in  
784 *Chlamydomonas reinhardtii* through Genomic Scale Modeling and Experimental Validation.  
785 *Front Plant Sci.* 7:43.
- 786 Ye N, Yang G, Chen Y, Zhang C, Zhang J, Peng X (2014) Two hydroxypyruvate reductases  
787 encoded by *OsHPR1* and *OsHPR2* are involved in photorespiratory metabolism in rice. *J*  
788 *Integr Plant Biol* 56: 170–180.
- 789 Yingjun Wang, Dan J. Stessman and Martin H. Spalding. (2015) The CO<sub>2</sub> concentrating  
790 mechanism and photosynthetic carbon assimilation in limiting CO<sub>2</sub>: how *Chlamydomonas*  
791 works against the gradient. *The Plant Journal* 82: 429–448  
792



793 **TABLES**

794 **Table 1. Activity assay of recombinant CrHPRs with substrate and cofactor combinations**

795

796 **FIGURE LEGENDS**

797 **Fig. 1 Enzyme activity assay and measurement of CrHPRs transcripts in photorespiration**

798 **(air) and non-photorespiration conditions (CO<sub>2</sub>)** (A) Assay of CrHPRs enzyme activity. (B)

799 Detection of CrHPRs in transcriptional level. Mean values  $\pm$  SD are from three independent

800 measurements. Means denoted by the same letter did not significantly differ at  $P < 0.05$ .

801 **Fig. 2 Knockout of *CrHPR1* impairs photorespiration** (A) Schematics of *CrHPR1* structures in

802 WT/CC-125 and *Crhpr1*. (B) qRT-PCR analysis of *CrHPR1* transcripts in the strains. (C) RT-PCR

803 of analysis of *CrHPR1* transcripts in the strains. (D-E) Growth curve of strains in air (D) and 3%

804 CO<sub>2</sub> condition (E). (F) The ratio of oxidation and carboxylation reaction of Rubisco in air.

805 Carboxylation reaction: white sector, Oxidation reaction: gray sector. (G) Concentration of

806 glycolate detected in the medium of each strain. Mean values  $\pm$  SD presents data from three

807 measurements. Means denoted by the same letter did not significantly differ at  $P < 0.05$ .

808 **Fig. 3 CrHPR2 knockdown strains show photorespiratory defects at *Crhpr1* background**

809 (A) Measurement of *CrHPR2* transcripts at both WT/CC-125 and *Crhpr1* background in air

810 condition. (B) Measurement of *CrHPR2* transcripts in *Crhpr1* and *Crhpr1-a2* strains. (C) Spot

811 tests showing growth of *Crhpr1* and *Crhpr1-a2* strains. (D) Growth curves of *Crhpr1* and

812 *Crhpr1-a2* strains in air. (E) The ratio of oxidation and carboxylation reaction of Rubisco in

813 *Crhpr1-a2* strains. Carboxylation reaction: white sector, Oxidation reaction: gray sector. (F)

814 Concentration of glycolate detected in the medium of each strain. Mean values  $\pm$  SD presents data

815 from three measurements. Means denoted by the same letter did not significantly differ at  $P < 0.05$ .

816 **Fig. 4 CrHPR4 participates in photorespiration as a chloroplast-targeting glyoxylate**

817 **reductase** (A) Measurement of *CrHPR4* transcripts at both WT/CC-125 and *Crhpr1* background

818 in air condition. (B) Measurement of *CrHPR4* transcripts in *Crhpr1* and *Crhpr1-a2* strains. (C)

819 Spot tests showing growth of *Crhpr1* and *Crhpr1-a4* strains. (D) Growth curves of *Crhpr1* and

820 *Crhpr1-a4* strains. (E) The ratio of oxidation and carboxylation reaction of Rubisco in *Crhpr1-a4*

821 strains. Carboxylation reaction: white sector, Oxidation reaction: gray sector. (F) Concentration of

822 glycolate detected in the medium of each strain. (G) Enzyme activity assay of *Crhpr1* and

823 *Crhpr1-a4* strains. HPR-NADH: white bars, HPR-NADPH: light gray bars, GR-NADH: gray bars,

824 GR-NADPH: dark gray bars. (H) Determination of ROS in *Crhpr1* and *Crhpr1-a4* strains treated



825 with salicylhydroxamic acid (SHAM). (I) Determination of Carboxylation efficiency in *Crhpr1*  
826 and *Crhpr1-a4* strains treated with salicylhydroxamic acid (SHAM); Mean values  $\pm$ SD from three  
827 measurements. Means denoted by the same letter did not significantly differ at  $P < 0.05$ .

828 **Fig. 5 Schematics of the functional mechanism of CrHPR4 in photosynthesis and**  
829 **photorespiration**

830

831 **Supplemental Data**

832 The following materials are available in the online version of this article.

833 **Table S1.** All *Chlamydomonas* strains used in the work.

834 **Table S2.** Oligonucleotides used in qRT-PCR.

835 **Table S3.** Oligonucleotides used in gene cloning.

836 **Table S4.** Oligonucleotides of amiRNA that target *CrHPRs*.

837 **Table S5.** Oxidation/carboxylation rate of Rubisco of WT/CC-125, *Crhpr1* and the rescued strains  
838 in air.

839 **Table S6.** Oxidation/carboxylation of Rubisco of CC-125-a2 strains in air.

840 **Table S7.** Oxidation/carboxylation of Rubisco of *Crhpr1-a2* strains in air.

841 **Table S8.** Oxidation/carboxylation of Rubisco of CC-125-a4 strains in air.

842 **Table S9.** Oxidation/carboxylation of Rubisco of *Crhpr1-a4* strains in air.

843 **Fig. S1.** Sequence alignment of hydroxypyruvate reductase homologues from select species.

844 **Fig. S2.** Sequence alignment of *Chlamydomonas* hydroxypyruvate reductase.

845 **Fig. S3.** Expression and purification of recombinant CrHPRs assayed by SDS-gel.

846 **Fig. S4.** Phylogenetic tree of HPR proteins inferred by bacterial and eukaryotic sources.

847 **Fig. S5.** Subcellular localization of the CFP reporter fused with N- or C-terminal peptides from  
848 CrHPRs

849 **Fig. S6.** Measurement of photosynthetic activity of *Crhpr1* and the rescued strains by chlorophyll  
850 fluorescence.

851 **Fig. S7.** Phenotypic analysis of the *CrHPR2* knockdown strains at CC-125 background.

852 **Fig. S8.** Measurement of photosynthetic activity of *Crhpr1-a2* strains by chlorophyll fluorescence.

853 **Fig. S9.** Phenotypic analysis of the *CrHPR4* knockdown strains at CC-125 background.

854 **Fig. S10.** Measurement of photosynthetic activity of *Crhpr1-a4* strains by chlorophyll  
855 fluorescence.

**Table 1. Activity assay of recombinant CrHPRs with substrate and cofactor combinations**

| Substrates            | CrHPR1     | CrHPR2     | CrHPR3    | CrHPR4       | CrHPR5       |
|-----------------------|------------|------------|-----------|--------------|--------------|
| Hydroxypyruvate:NADH  | 312.5±19.3 | 2.58±0.01  | -         | 46.23±1.31   | 1.86±0.11    |
| Hydroxypyruvate:NADPH | 1.70±0.24  | 11.03±0.57 | 3.03±0.01 | -            | 292.40±13.49 |
| Glyoxylate:NADH       | 13.91±0.48 | 2.05±0.08  | -         | 14.35±0.20   | 0.91±0.04    |
| Glyoxylate:NADPH      | 0.14±0.02  | 3.66±0.09  | 5.65±0.01 | -            | 5.72±0.19    |
| Pyruvate:NADH         | -          | -          | -         | 666.67±12.36 | -            |
| Pyruvate:NADPH        | -          | -          | -         | -            | -            |

Shown are mean activities ± SD from three independent measurements with tag-purified recombinant CrHPRs ( $\mu\text{mol}\cdot\text{min}^{-1}\cdot\text{mg}^{-1}$  protein).

A

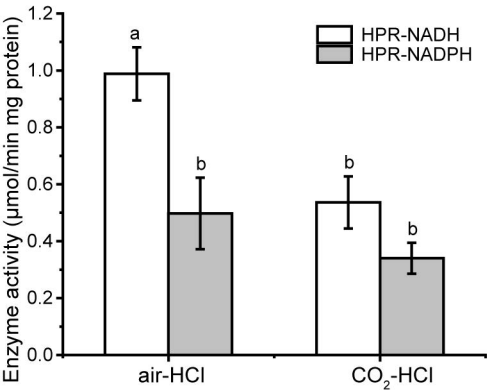

B

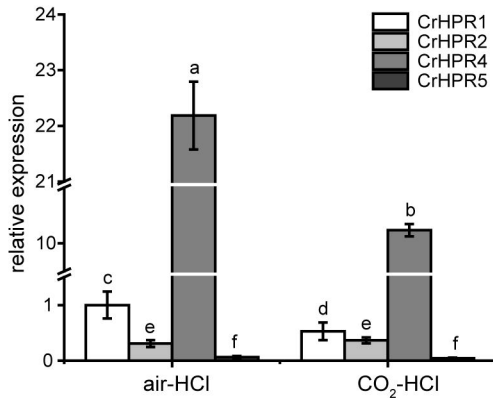

**A**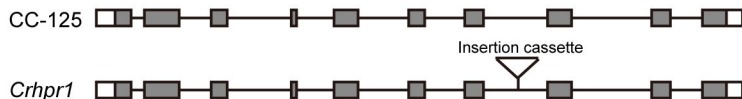**B**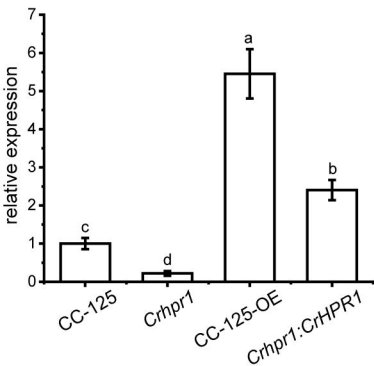**C**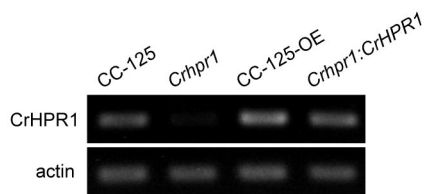**F**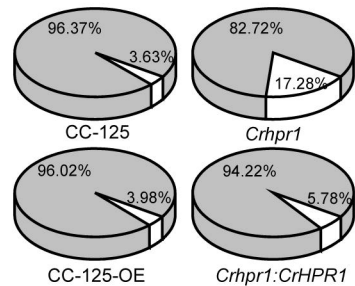**D**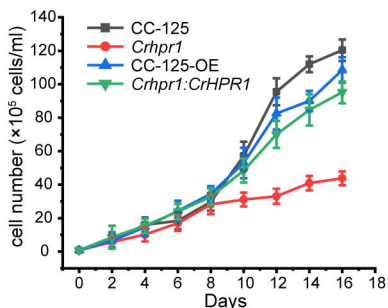**E**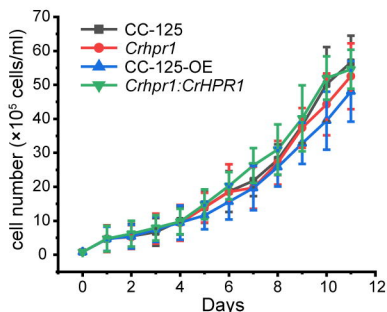**G**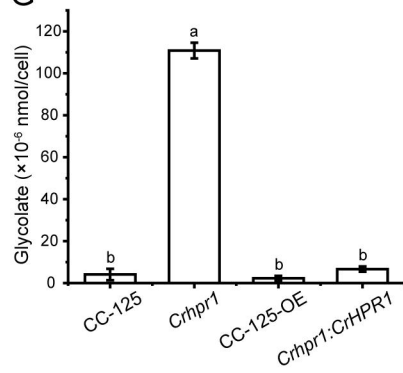

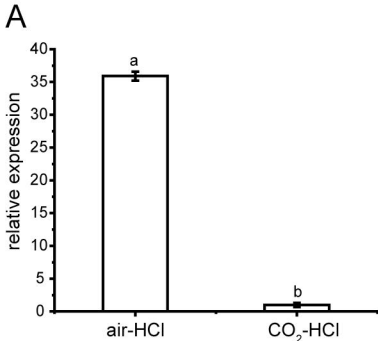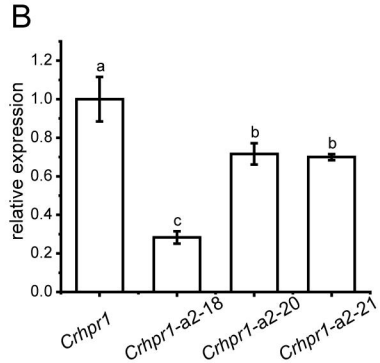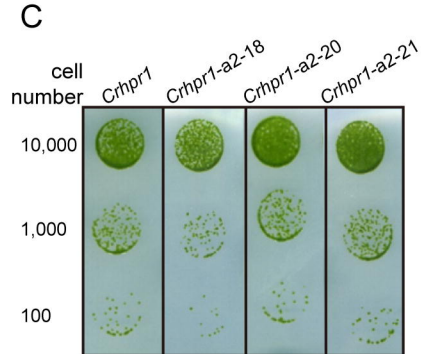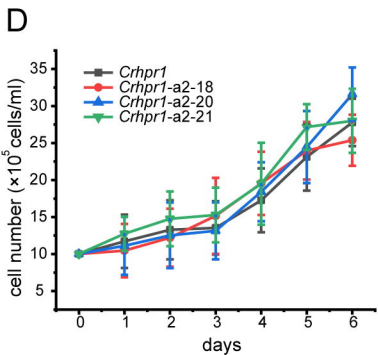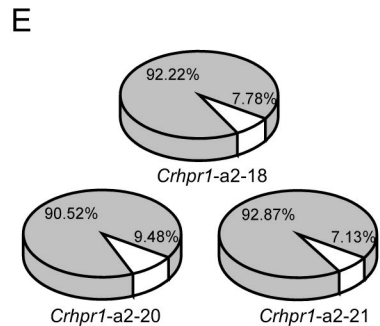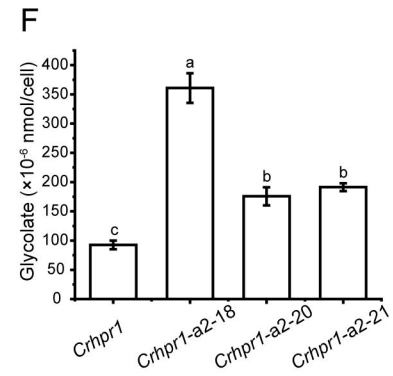

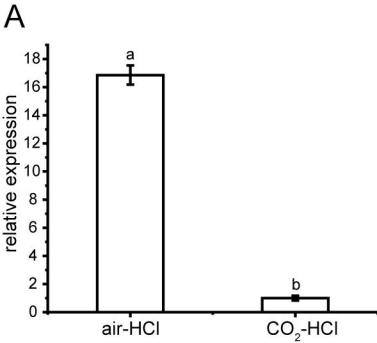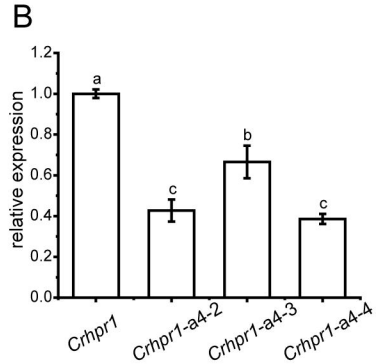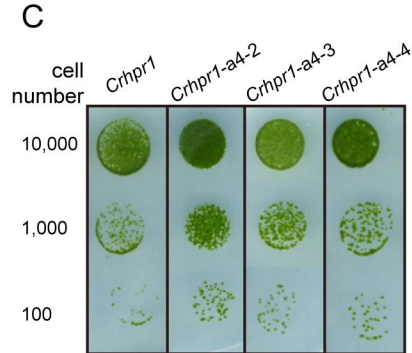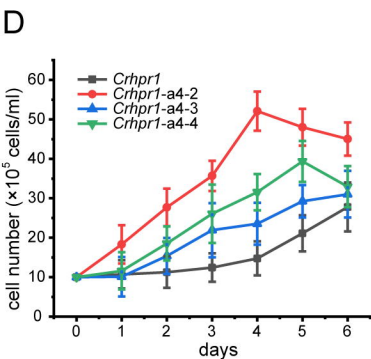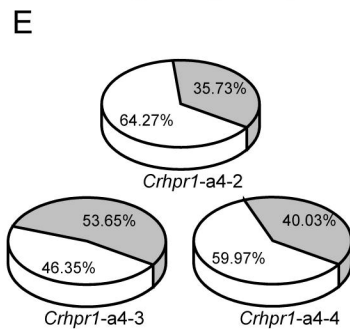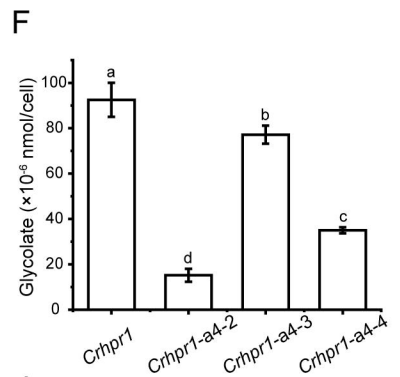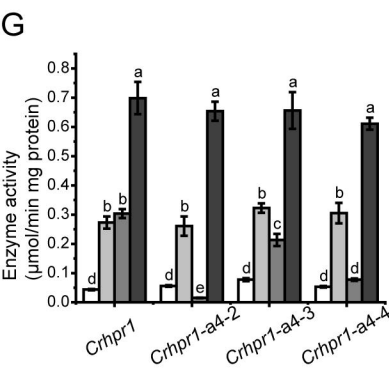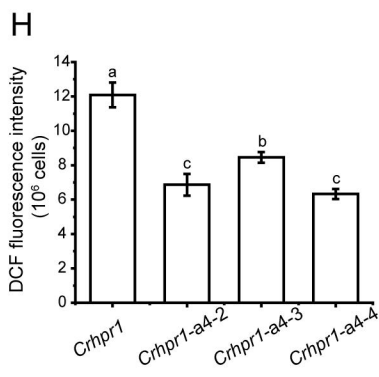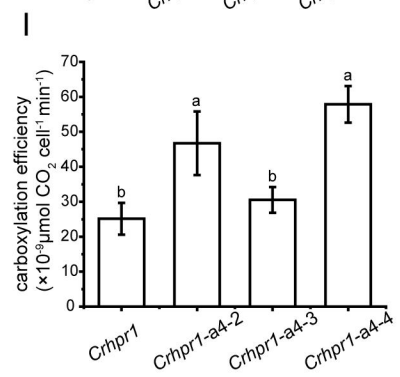

*CHLOROPLASTS*

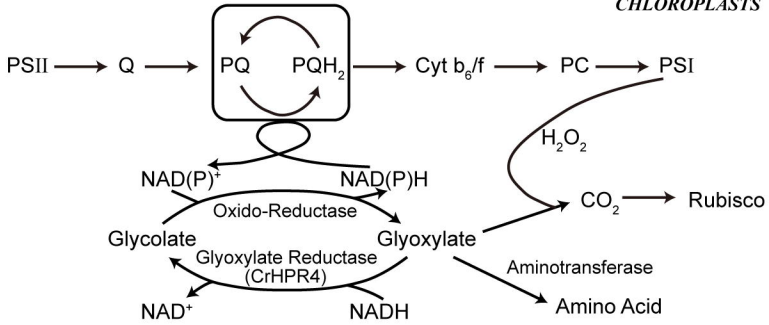

Source: https://www.biorxiv.org/content/10.1101/2021.04.20.440714v1.full.pdf
